# Supplementary material
Source: publisher site journal article supplement (https://www.dovepress.com/article/462075)
Supplement: Supplementary file 1 [file get_supplementary_file.php]

Supplemental table 1. Univariable and multivariable analyses for postoperative complications

| Variables | Univariate analysis | | Multivariate analysis | |
| --- | --- | --- | --- | --- |
| OR (95% CI) | P value | OR (95% CI) | P value |
| Gender  Male  Female | 1  0.798 (0.365 - 1.746) | 0.572 |  |  |
| Age, years | 1.019 (0.996 - 1.042) | 0.111 |  |  |
| Etiology |  |  |  |  |
| Tuberculosis | 1 |  |  |  |
| Idiopathic | 0.388 (0.105 - 1.438) | 0.157 |  |  |
| Smoking  Never  Former  Current | 1  1.236 (0.578 - 2.646)  0.533 (0.205 - 1.385) | 0.585  0.197 |  |  |
| Alcohol drinking |  |  |  |  |
| Never  Former  Current | 1  1.043 (0.354 - 3.074)  1.195 (0.507 - 2.814) | 0.939  0.684 |  |  |
| BMI | 0.930 (0.835 - 1.037) | 0.190 |  |  |
| NYHA functional class |  |  |  |  |
| Ⅰ | 1 |  | 1 |  |
| Ⅱ | 2.038 (0.230 - 18.089) | 0.523 | 2.807 (0.258 - 30.570) | 0.397 |
| Ⅲ | 5.538 (0.636 - 48.262) | 0.121 | 4.991 (0.459 - 54.264) | 0.187 |
| Ⅳ | 24.000 (1.140 - 505.193) | 0.041 | 39.784 (1.229 - 1287.415) | 0.038 |
| Hypertension | 0.518 (0.215 - 1.249) | 0.143 |  |  |
| Diabetes | 0.254 (0.055 - 1.179) | 0.080 |  |  |
| Atrial fibrillation | 1.872 (0.755 - 4.641) | 0.176 |  |  |
| COPD | / | 0.986 |  |  |
| CHD | 3.623 (0.870 - 15.076) | 0.077 |  |  |
| PVD | 0.660 (0.124 - 3.513) | 0.626 |  |  |
| Stroke | / | 0.988 |  |  |
| DVT | 2.689 (0.726 - 9.955) | 0.139 |  |  |
| Pericardial calcification | 1.363 (0.608 - 3.056) | 0.452 |  |  |
| Pericardial thickness | 1.115 (1.013 - 1.228) | 0.026 | 0.984 (0.867 - 1.117) | 0.804 |
| CVP | 1.147 (1.067 - 1.233) | < 0.001 | 1.128 (1.042 - 1.221) | 0.003 |
| LVEF | 0.950 (0.900 - 1.003) | 0.066 |  |  |
| Platelets | 1.002 (0.998 - 1.007) | 0.318 |  |  |
| CRP | 1.010 (0.992 - 1.029) | 0.286 |  |  |
| ESR | 0.998 (0.985 - 1.012) | 0.804 |  |  |
| BNP | 1.002 (0.999 - 1.004) | 0.148 |  |  |
| DD level  ≤2085.5  >2085.5 | 1  6.563 (3.090 - 13.942) | < 0.001 | 1  6.892 (2.604 - 18.235) | < 0.001 |
| APTT level  ≤32.05  >32.05 | 1  1.451 (0.703 - 2.993) | 0.314 |  |  |
| PT level  ≤12.55  >12.55 | 1  2.074 (1.020 - 4.215) | 0.044 | 1  0.921 (0.263 - 3.222) | 0.897 |
| INR level  ≤1.105  >1.105 | 1  1.924 (1.001 - 3.697) | 0.050 | 1  1.244 (0.418 - 3.702) | 0.695 |
| TT level  ≤17.55  >17.55 | 1  1.631 (0.782 - 3.399) | 0.192 |  |  |
| FBG level  ≤441  >441 | 1  1.466 (0.648 - 3.314) | 0.358 |  |  |

The cut-off values for APTT, PT, INR, TT, and FBG were calculated by ROC curves.

OR, odds ratio; CI, confidence interval; BMI, body mass index; NYHA, New York Heart Association; COPD, chronic obstructive pulmonary disease; CHD, coronary heart disease; PVD, peripheral vascular disease; DVT, deep vein thrombosis; CVP, central venous pressure; LVEF, left ventricular ejection fraction (measured on echocardiogram); CRP, C-reactive protein; ESR, erythrocyte sedimentation rate; BNP, brain natriuretic peptide; DD, D-dimer; APTT, activated partial thromboplastin time; PT, prothrombin time; INR, international normalized ratio; TT, thrombin time; FBG, fibrinogen
